# Supplementary material for: Zebrafish as a Vertebrate Model for Studying Nodavirus Infections
Source: Front Immunol. 2022 Mar 24;13:863096. doi: 10.3389/fimmu.2022.863096 (PMC8987509; doi:10.3389/fimmu.2022.863096)
Supplement: Supplementary file 1 [file DataSheet_1.xlsx]

## Sheet: NNV-inf vs control 1dpi
Supplementary File S1. DEGs between NNV-infected and control zebrafish larvae at 1 dpi (FC > |2|; FDR < 0.05).
Name	Fold change	P-value	FDR p-value	Bonferroni	ENSEMBL	Descripción
lgals17	2758.5	4.61879e-06	0.00126166	0.112287	ENSDARG00000088251	Galectin 17
CABZ01073795.1	139.306	8.18469e-08	3.43066e-05	0.00198978	ENSDARG00000010729	interferon-induced protein 44
mxb	89.1636	2.4647e-14	4.60917e-11	5.99192e-10	ENSDARG00000004953	myxovirus (influenza) resistance B
rsad2	79.6914	0	0	0	ENSDARG00000004952	radical S-adenosyl methionine domain containing 2
CU984600.2	71.0792	0	0	0	ENSDARG00000098204	"chaperone"
mxe	70.5644	3.38396e-13	4.83926e-10	8.22674e-09	ENSDARG00000014427	myxovirus (influenza virus) resistance E
si:ch73-190m4.1	56.7091	1.22125e-13	2.12069e-10	2.96897e-09	ENSDARG00000075785	"herc5.1, Glycyl thioester intermediate"
isg15	55.34	0	0	0	ENSDARG00000086374	ISG15 ubiquitin-like modifier
cmpk2	49.2748	2.40941e-11	2.343e-08	5.85751e-07	ENSDARG00000031359	cytidine monophosphate (UMP-CMP) kinase 2,
stat1b	47.0898	0	0	0	ENSDARG00000076182	signal transducer and activator of
zmp:0000000912	41.2368	6.90437e-12	7.29791e-09	1.67852e-07	ENSDARG00000087575	zmp:0000000912
rnf213b	40.0899	0	0	0	ENSDARG00000103551	ring finger protein 213b
mxa	39.9205	6.66134e-16	1.47222e-12	1.61944e-11	ENSDARG00000021688	myxovirus (influenza) resistance A
si:dkey-42i9.7	37.7885	5.64951e-05	0.0121088	1	ENSDARG00000071543	si:dkey-42i9.7
aste1a	36.3632	4.01368e-08	1.84107e-05	0.000975765	ENSDARG00000070132	asteroid homolog 1a
si:dkey-188i13.9	36.3398	5.81686e-05	0.0122969	1	ENSDARG00000074754	si:dkey-188i13.9
mxf	36.2487	2.58936e-10	1.85147e-07	6.29499e-06	ENSDARG00000026049	myxovirus (influenza virus) resistance F
si:ch211-281g13.5	35.3113	7.06102e-13	9.03476e-10	1.7166e-08	ENSDARG00000074052	si:ch211-281g13.5
zgc:152658	26.1857	3.67846e-06	0.00107659	0.0894271	ENSDARG00000018587	zgc:152658
mov10b.2	24.9482	6.3462e-11	5.71417e-08	1.54283e-06	ENSDARG00000056065	Moloney leukemia virus 10b, tandem duplicate 2
zgc:152791	22.7447	4.3725e-11	4.08846e-08	1.063e-06	ENSDARG00000039243	zgc:152791
si:ch73-223f5.1	21.3126	4.06091e-10	2.74235e-07	9.87247e-06	ENSDARG00000105364	si:ch73-223f5.1
helz2	19.3892	0	0	0	ENSDARG00000016527	helicase with zinc finger 2,
znfx1	19.225	0	0	0	ENSDARG00000100280	zinc finger, NFX1-type containing 1
ifit14	17.9182	3.17516e-07	0.000110273	0.00771913	ENSDARG00000071012	interferon-induced protein with tetratricopeptide repeats 14
ifi45	17.4729	1.92957e-11	1.95457e-08	4.69097e-07	ENSDARG00000017489	zgc:123068
si:dkey-211g8.8	16.9093	5.89566e-06	0.00157505	0.143329	ENSDARG00000096311	si:dkey-211g8.8
si:dkey-85k7.12	16.2667	0	0	0	ENSDARG00000078731	si:dkey-85k7.12
dhx58	13.845	2.16516e-12	2.63186e-09	5.26371e-08	ENSDARG00000089463	DEXH (Asp-Glu-X-His) box polypeptide 58
ssuh2.2	12.7304	2.11999e-10	1.56179e-07	5.15392e-06	ENSDARG00000054418	ssu-2 homolog, tandem duplicate 2
mhc1uba	11.2975	0.000124123	0.0239489	1	ENSDARG00000075963	major histocompatibility complex class I
ftr80	10.3039	3.9559e-05	0.00874289	0.961718	ENSDARG00000067661	finTRIM family, member 80
cxcl18b	10.056	4.44089e-16	1.07963e-12	1.07963e-11	ENSDARG00000075045	chemokine (C-X-C motif) ligand 18b
si:dkeyp-9d4.2	9.92702	3.71986e-06	0.00107659	0.0904334	ENSDARG00000029720	si:dkeyp-9d4.2
FO704622.1	9.81689	6.4852e-10	4.26113e-07	1.57662e-05	ENSDARG00000089661	"interferon-induced protein 44-like"
si:ch211-284o19.8	9.74269	3.6311e-12	4.2036e-09	8.82756e-08	ENSDARG00000053836	si:ch211-284o19.8
pkz	8.86558	2.89416e-10	2.01028e-07	7.03599e-06	ENSDARG00000052396	protein kinase containing Z-DNA binding domains
xaf1	8.44575	9.13647e-10	5.84518e-07	2.22117e-05	ENSDARG00000068939	XIAP associated factor 1
si:ch1073-110a20.7_1	8.44482	2.22601e-08	1.10442e-05	0.000541166	ENSDARG00000090557	microfibril associated protein
si:dkey-40g16.6	7.42964	4.92398e-08	2.21679e-05	0.00119707	ENSDARG00000056804	interleukin 4 induced 1
ccl34a.4	6.67677	1.40103e-07	5.49362e-05	0.00340604	ENSDARG00000090873	"chemokine (C-C motif) ligand 34a, duplicate 4"
irf1b	6.59796	1.44329e-13	2.33919e-10	3.50878e-09	ENSDARG00000043249	thioredoxin domain containing 15
zgc:153654	6.50698	4.07511e-09	2.30395e-06	9.90699e-05	ENSDARG00000060322	zgc:153654
CABZ01085275.1	6.41971	1.74124e-07	6.61427e-05	0.00423313	ENSDARG00000113107	"poly [ADP-ribose] polymerase 12-like"
CABZ01088134.1	6.0641	5.67811e-05	0.0121088	1	ENSDARG00000033587	"enoyl-[acyl-carrier-protein] reductase, mitochondrial-like"
phf11	6.01565	1.64041e-10	1.36454e-07	3.988e-06	ENSDARG00000021677	PHD finger protein 11
mov10b.1	5.90017	6.10623e-13	8.24714e-10	1.48448e-08	ENSDARG00000061177	Moloney leukemia virus 10b, tandem duplicate 1
ftr72	5.71649	4.54456e-06	0.00125549	0.110483	ENSDARG00000026704	finTRIM family, member 72
ifi46	5.59253	2.69271e-07	9.62685e-05	0.00654626	ENSDARG00000078389	si:dkey-188i13.7
acod1	5.55493	1.5638e-06	0.000493733	0.0380174	ENSDARG00000069844	immunoresponsive 1 homolog (mouse)
itln3	5.54376	2.30555e-07	8.49246e-05	0.00560502	ENSDARG00000003523	intelectin 3
epsti1	5.53554	0.00017208	0.0326832	1	ENSDARG00000094578	epithelial stromal interaction 1
si:dkey-23i12.7	5.51775	7.30118e-05	0.0150423	1	ENSDARG00000105562	si:dkey-23i12.7
ascl1b_1	5.36842	1.72582e-10	1.36454e-07	4.19564e-06	ENSDARG00000009702	achaete-scute family bHLH transcription factor 1b
ftr93	5.15948	6.22445e-08	2.75132e-05	0.00151323	ENSDARG00000039852	finTRIM family, member 93
cbln11	5.05928	3.93243e-08	1.84107e-05	0.000956012	ENSDARG00000086654	cerebellin 11
si:ch211-281g13.4	4.82039	4.40352e-06	0.00124481	0.107054	ENSDARG00000075389	si:ch211-281g13.4
si:dkey-195m11.11	4.76659	1.67579e-07	6.46668e-05	0.00407401	ENSDARG00000097909	si:dkey-195m11.11
ftr33	4.72283	0.000273415	0.0471417	1	ENSDARG00000095032	finTRIM family, member 33
irf7	4.64077	1.47095e-09	8.94007e-07	3.57603e-05	ENSDARG00000045661	interferon regulatory factor 7
cp	4.58952	0	0	0	ENSDARG00000010312	ceruloplasmin
si:ch73-252i11.1	4.55554	9.31158e-11	8.08478e-08	2.26374e-06	ENSDARG00000100660	"C3H1-type"
btr09	4.55125	1.12882e-05	0.00280027	0.274427	ENSDARG00000054805	bloodthirsty-related gene family, member 9
stat2	4.53793	2.23044e-13	3.38901e-10	5.42242e-09	ENSDARG00000031647	signal transducer and activator of transcription 2
wu:fj29h11	4.33181	1.78823e-10	1.36454e-07	4.34737e-06	ENSDARG00000096562	wu:fj29h11
si:ch211-218g23.6	4.3292	7.87986e-05	0.0159639	1	ENSDARG00000103556	si:ch211-218g23.6
sult5a1	4.30798	4.23286e-05	0.00927074	1	ENSDARG00000007769	sulfotransferase family 5A, member 1
gig2e	4.29669	3.8764e-08	1.84107e-05	0.000942393	ENSDARG00000075757	grass carp reovirus (GCRV)-induced gene 2e
ccl35.1	4.25511	0.000180837	0.0340801	1	ENSDARG00000103466	chemokine (C-C motif) ligand 35, duplicate 1
FO744833.1	4.22906	0.00028214	0.0477132	1	ENSDARG00000107280	"poly [ADP-ribose] polymerase 14-like"
si:dkey-97a13.6	4.05518	9.00603e-09	4.86546e-06	0.000218946	ENSDARG00000012600	"helz2b, ribonuclease activity"
irge4	3.87951	2.76521e-06	0.000819817	0.067225	ENSDARG00000070317	immunity-related GTPase family, e4
mxc	3.8244	3.89761e-09	2.25607e-06	9.47548e-05	ENSDARG00000024789	myxovirus (influenza virus) resistance C
slc47a2.2	3.81437	1.19986e-06	0.000383812	0.0291697	ENSDARG00000074136	zgc:163136
dhrs13b.2	3.72157	1.20397e-07	4.87829e-05	0.00292697	ENSDARG00000076483	zgc:198241
irf10	3.69267	0.00015789	0.0302241	1	ENSDARG00000027658	interferon regulatory factor 10
usp18	3.59258	0.000253399	0.0443192	1	ENSDARG00000088078	ubiquitin specific peptidase 18
gck	3.39539	0.000212846	0.0383296	1	ENSDARG00000068006	glucokinase (hexokinase 4)
si:ch1073-385f13.3	3.31478	0.000110386	0.0214687	1	ENSDARG00000092584	si:ch1073-385f13.3
fas	3.28823	4.49922e-05	0.00976613	1	ENSDARG00000043586	Fas cell surface death receptor
gig2o	3.26258	1.18346e-05	0.00290617	0.287711	ENSDARG00000086903	grass carp reovirus (GCRV)-induced gene 2o
tnfaip2b	3.22004	4.47058e-06	0.00124925	0.108684	ENSDARG00000058160	tumor necrosis factor, alpha-induced protein 2b
dram1	3.21436	2.39271e-05	0.00559319	0.581692	ENSDARG00000045561	DNA-damage regulated autophagy modulator 1
irak3	3.18651	3.08036e-05	0.00699876	0.748867	ENSDARG00000053131	interleukin-1 receptor-associated kinase 3
slc2a6	3.15062	6.27503e-07	0.000211878	0.0152552	ENSDARG00000058731	solute carrier family 2 member 6
irf3	3.14447	6.88322e-06	0.00179933	0.167338	ENSDARG00000076251	interferon regulatory factor 3
rnf213a	3.1107	5.5893e-09	3.08821e-06	0.000135881	ENSDARG00000099465	ring finger protein 213a
hpxb	3.05751	7.48576e-08	3.24976e-05	0.00181986	ENSDARG00000051912	"hemopexin b"
eif2ak2	3.04203	3.87257e-06	0.0011076	0.094146	ENSDARG00000068729	eukaryotic translation initiation factor 2-alpha kinase 2
si:ch211-270n8.1	3.00128	3.11745e-05	0.00701744	0.757883	ENSDARG00000045089	si:ch211-270n8.1
si:ch211-194m7.3	2.91308	1.31719e-09	8.21079e-07	3.20221e-05	ENSDARG00000074322	si:ch211-194m7.3
parp12a	2.90481	6.26385e-07	0.000211878	0.015228	ENSDARG00000042496	poly (ADP-ribose) polymerase family,
si:ch211-147m6.1	2.80596	1.24339e-08	6.57134e-06	0.000302282	ENSDARG00000109648	"Olfactomedin-like"
c3a.1	2.75645	1.4877e-14	3.01395e-11	3.61674e-10	ENSDARG00000012694	complement component c3a, duplicate 1
FO744833.2	2.74792	2.43571e-06	0.000740183	0.0592147	ENSDARG00000112454	"poly [ADP-ribose] polymerase 14"
si:ch211-245h14.1	2.73859	7.24962e-05	0.0150423	1	ENSDARG00000041911	si:ch211-245h14.1
si:ch211-91p5.3	2.71508	7.9539e-08	3.39241e-05	0.00193367	ENSDARG00000089227	si:ch211-91p5.3
si:ch211-244b2.3	2.59019	6.477e-06	0.00171155	0.157462	ENSDARG00000069244	si:ch211-244b2.3
ccl19a.1	2.56651	1.94406e-05	0.00467941	0.47262	ENSDARG00000058389	chemokine (C-C motif) ligand 19a, tandem duplicate 1
si:ch211-199g17.2	2.51089	2.03565e-08	1.03101e-05	0.000494887	ENSDARG00000092310	si:ch211-199g17.2
si:ch211-39f2.3	2.47972	0.000282476	0.0477132	1	ENSDARG00000097539	si:ch211-39f2.3
trim25	2.46824	9.40481e-08	3.87526e-05	0.0022864	ENSDARG00000104396	tripartite motif containing 25
cfb	2.44071	5.84577e-12	6.45984e-09	1.42116e-07	ENSDARG00000055278	complement factor B
si:dkey-188i13.10	2.39489	0.000284579	0.0477132	1	ENSDARG00000075151	si:dkey-188i13.10
lgals3bpb	2.37373	2.48874e-06	0.000746959	0.0605036	ENSDARG00000040528	lectin, galactoside-binding, soluble, 3 binding protein b
c3a.6	2.36217	1.79612e-10	1.36454e-07	4.36654e-06	ENSDARG00000043719	complement component c3a, duplicate 6
ifi35	2.33833	4.82412e-06	0.0013031	0.117279	ENSDARG00000075643	interferon-induced protein 35
mpeg1.2	2.33168	2.97979e-09	1.76687e-06	7.24418e-05	ENSDARG00000043093	macrophage expressed 1, tandem duplicate 2
socs1a	2.27469	8.48307e-05	0.017044	1	ENSDARG00000038095	suppressor of cytokine signaling 1a
CU499336.2	2.22421	3.98898e-08	1.84107e-05	0.00096976	ENSDARG00000114387	"Uncharacterized protein, positive regulation of transcription by RNA polymerase II"
si:ch211-219a4.3	2.19836	1.99197e-06	0.000612998	0.0484268	ENSDARG00000040445	"Poly [ADP-ribose] polymerase, parp14rs1"
irf9	2.15436	8.87537e-07	0.00029158	0.0215769	ENSDARG00000016457	interferon regulatory factor 9
lgals9l3	2.1433	1.3976e-07	5.49362e-05	0.00339772	ENSDARG00000041060	lectin, galactoside-binding, soluble, 9 (galectin 9)-like 3
c4b	2.13774	2.63966e-07	9.57801e-05	0.00641727	ENSDARG00000038424	si:dkey-8k3.2
mmp9	2.12979	2.08385e-05	0.00496671	0.506604	ENSDARG00000042816	matrix metallopeptidase 9
tat	2.12241	7.19516e-06	0.00186087	0.174921	ENSDARG00000069630	tyrosine aminotransferase
c7b	2.092	9.21562e-05	0.0180678	1	ENSDARG00000057121	"complement component 7b"
tnip2	2.09142	0.000191695	0.0355749	1	ENSDARG00000074501	TNFAIP3 interacting protein 2
steap4	2.05956	1.74191e-08	9.0101e-06	0.000423475	ENSDARG00000055901	STEAP family member 4
si:dkey-261l7.2	2.0262	8.54378e-06	0.00216362	0.207708	ENSDARG00000094345	si:dkey-261l7.2
zmp:0000000735	2.00103	7.37131e-07	0.000245485	0.0179204	ENSDARG00000073789	zmp:0000000735
itgae.1	-2.00429	1.7491e-05	0.00425223	0.425223	ENSDARG00000098012	integrin, alpha E, tandem duplicate 1
si:dkey-239j18.3	-5.23167	0.000283736	0.0477132	1	ENSDARG00000089806	si:dkey-239j18.3
he1.1	-10.5544	8.05669e-06	0.00206175	0.195866	ENSDARG00000023656	hatching enzyme 1a
znf423	-15.0544	8.98997e-05	0.0177687	1	ENSDARG00000095732	zinc finger protein 423
